# Supplementary material for: Protein kinase Gin4 negatively regulates flippase function and controls plasma membrane asymmetry
Source: PubMed Central journal article supplement — J Cell Biol. 2015 Feb 2;208(3):299–311. doi: 10.1083/jcb.201410076 (PMC4315245; doi:10.1083/jcb.201410076), 2015-02-02
Supplement: supp_jcb.201410076_JCB_201410076_sm.pdf [file supp_jcb.201410076_JCB_201410076_sm.pdf]

Roelants et al., <http://www.jcb.org/cgi/content/full/jcb.201410076/DC1>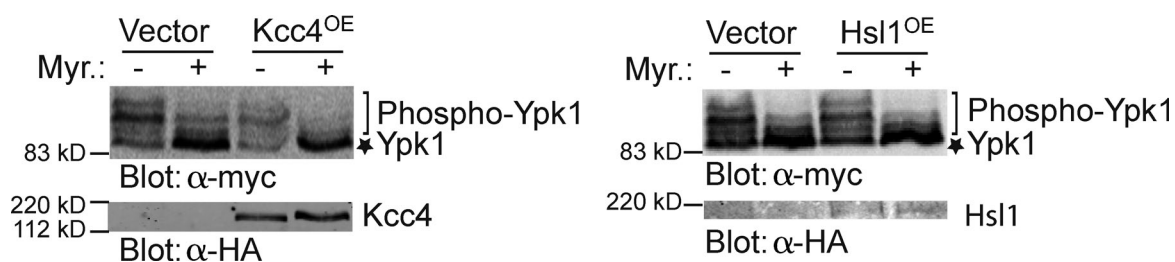

Figure S1. **Kcc4 and Hsl1 do not affect Fpk1-dependent phosphorylation of Ypk1.** Wild-type cells (Y258) carrying a plasmid expressing Ypk1-myc from the *GAL1* promoter (pAM54) and either an empty vector (BG1805) or the same vector expressing Kcc4 (pKcc4-zz; left) or Hsl1-(HA)<sub>3</sub> (pMJS109; right) from the *GAL1* promoter were lysed, and the resulting extracts were resolved by SDS-PAGE and analyzed by immunoblotting with anti-c-myc mAb 9E10 and anti-HA antibodies, as indicated.

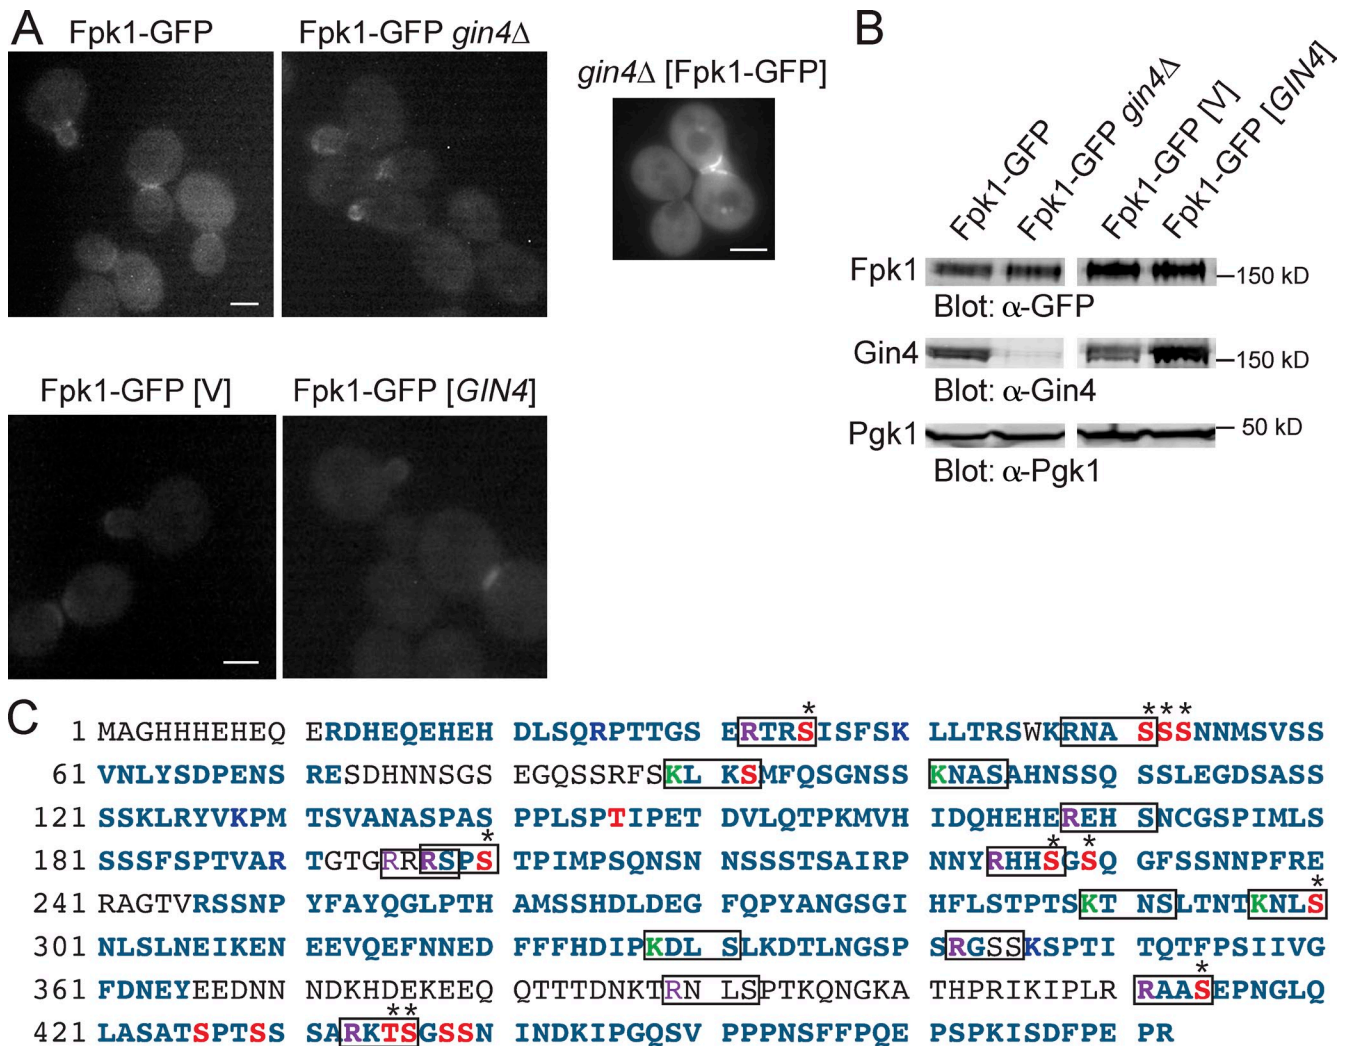

Figure S2. **Gin4 does not affect Fpk1 localization or level.** (A) Wild-type cells (YFR221) or isogenic *gin4* $\Delta$  cells (YFR224) expressing Fpk1-GFP (top left) from its chromosomal locus, as well as *gin4* $\Delta$  cells (YAT100) expressing Fpk1-GFP from the *TPI1* promoter on a *CEN* plasmid [pFR150; top right], and wild-type cells (YFR221) expressing Fpk1-GFP from its endogenous promoter and carrying an empty vector [V] (YCpUG) or the same vector overexpressing *GIN4* (pMVB115) from the *GAL1* promoter (bottom) were grown to mid-exponential phase and viewed with fluorescence microscopy. Bars, 2  $\mu$ m. (B) The same cells as in A were lysed and the resulting extracts were resolved by SDS-PAGE and analyzed by immunoblotting with anti-GFP and anti-Gin4 antibodies. (C) Sites in the N-terminal regulatory domain of Fpk1 phosphorylated by Gin4 were determined by mass spectrometry, as described in the Materials and methods. Sequence coverage is indicated by bold blue letters. Ser and Thr residues phosphorylated in the presence of Gin4 are indicated in red. Occurrences of the apparent Gin4 consensus sequence (-R/K-x-x-S-) derived from this work and from analysis of synthetic peptide arrays (Mok et al., 2010), with Arg (purple) and Lys (green) highlighted, are boxed. Asterisks indicate the 10 Ser and 1 Thr mutated to Ala in Fpk1<sup>11A</sup>.

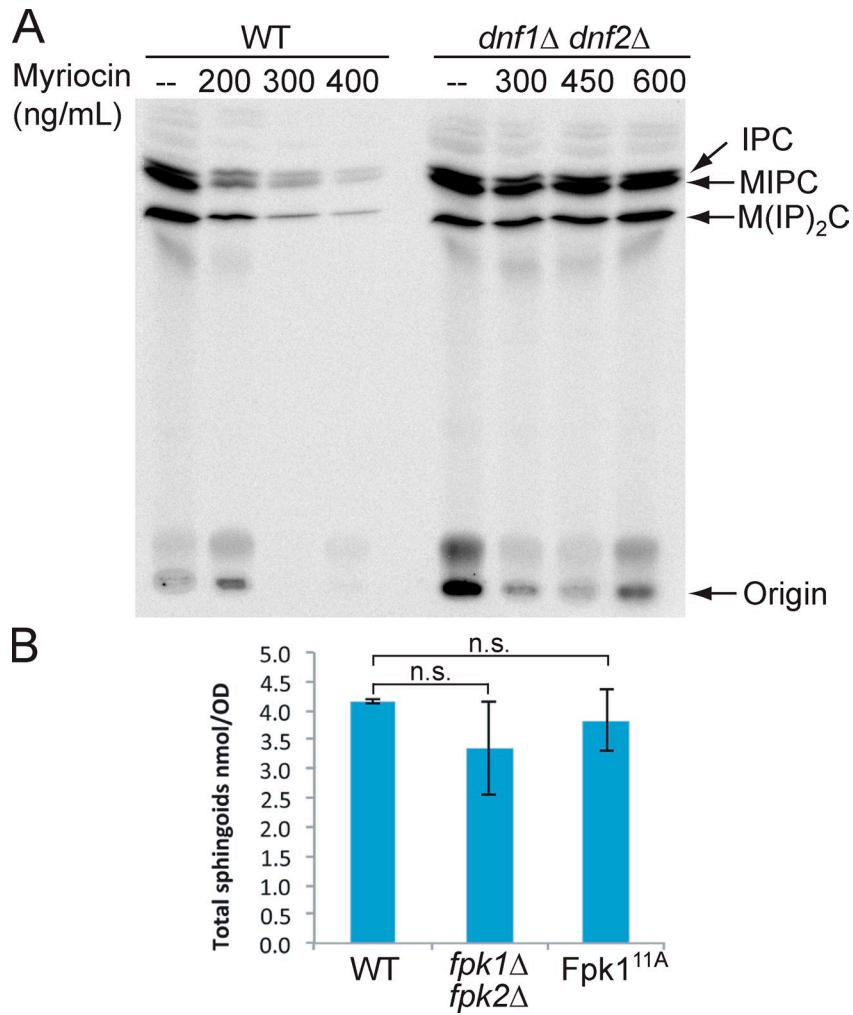

Figure S3. **PM flippase activity is required for susceptibility to Myr, but does not affect sphingolipid levels.** (A) Wild-type (BY4741, WT) and isogenic *dnf1Δ dnf2Δ* (YFR313) cells were grown at 30°C to mid-exponential phase, then treated with the indicated amount of Myr and cultivated for an additional 8 h. An equivalent number of cells from each culture (2 ml of  $A_{600nm} = 1.0$ ) were then labeled with 100  $\mu$ Ci of [<sup>32</sup>P]H<sub>2</sub>PO<sub>4</sub> for 3 h. Complex (inositol-P-containing) sphingolipids were then extracted and analyzed by ascending TLC and autoradiography as described in the Materials and methods. The identity of the indicated complex sphingolipid species was assigned on the basis of either pharmacological inhibition or mutational ablation of the enzymes responsible for the production of IPC (Aur1), MIPC (Sur1-Csg2 and Csh1-Csg2), and M(IP)<sub>2</sub>C (Ipt1) in control cultures (not depicted). (B) Total sphingoid base (PHS) was generated from equivalent numbers of wild-type (BY4741, WT), isogenic *fpk1Δ fpk2Δ* (YFR205), and Fpk1<sup>11A</sup> (YJW2) cells and quantified by HPLC, as described in the Materials and methods. Values represent the mean and SD (error bars) of five independent experiments. n.s., not statistically significant.

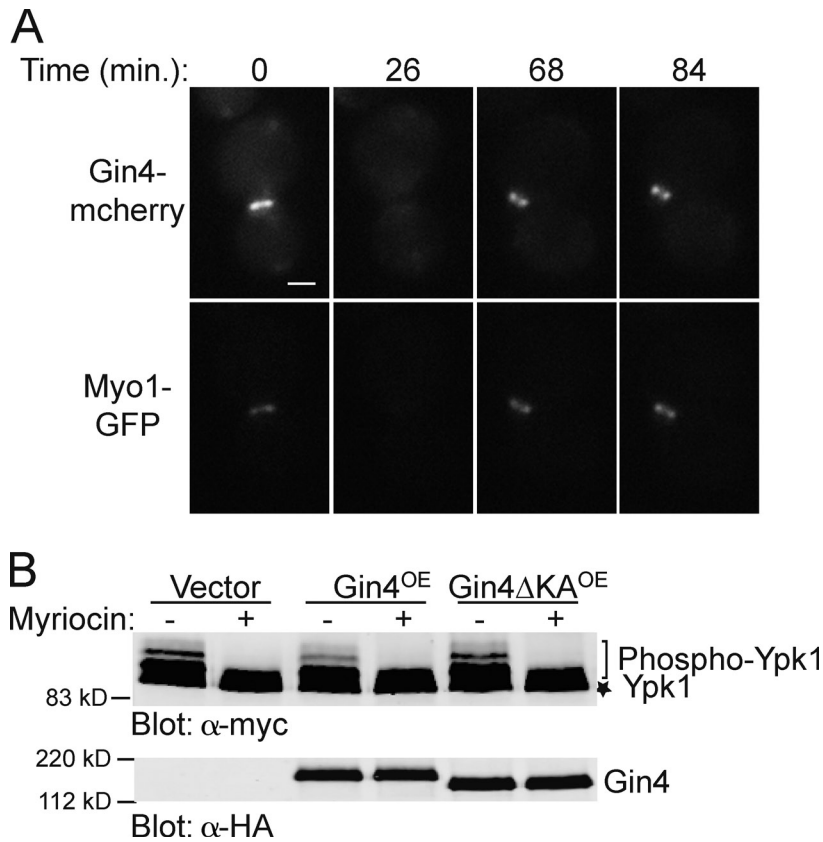

Figure S4. **KA1 domain-mediated PM targeting of Gin4 is required for its negative regulation of Fpk1 activity.** (A) Cells coexpressing Gin4-mCherry and Myo1-GFP (YFR388) were observed by time-lapse microscopy at the indicated times. Bar, 2  $\mu$ m. (B) Wild-type strain (Y258) expressing Ypk1-myc from the *GAL1* promoter (pAM54) and also carrying either an empty vector (BG1805) or the same vector expressing Gin4 (pGin4-zz) or Gin4 $\Delta$ KA-zz (pFR305) from the *GAL1* promoter, were grown to mid-exponential phase, not treated or treated with Myr (1.25  $\mu$ M), and lysed. The resulting extracts were resolved by SDS-PAGE and analyzed by immunoblotting with anti-c-myc mAb 9E10 and anti-HA antibodies.

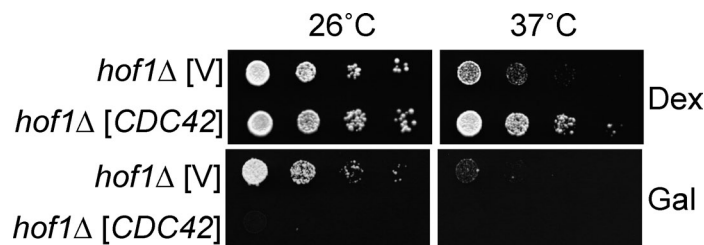

Figure S5. **Modest elevation of Cdc42 rescues *hof1* $\Delta$  cells, whereas galactose-driven overexpression is toxic.** Cultures of *hof1* $\Delta$  cells (YFR386) carrying both an empty vector (YCpLG, V), or the same vector expressing *CDC42* (PB3050) and pRS316-*HOF1*, were streaked onto plates containing 5-FOA medium to select against the presence of the *URA3*-marked pRS316-*HOF1* vector. Freshly appearing colonies were then streaked on a second set of 5-FOA plates. The resulting colonies were grown to mid-exponential phase in SCD-L and serial 10-fold dilutions were spotted on SCD-L (Dex, low/leaky expression of *GAL*<sub>prom</sub>-*CDC42*) or SCG-L (Gal, high expression of *GAL*<sub>prom</sub>-*CDC42*) plates. After incubation for 2 d (Dex) or 5 d (Gal) at either 26°C or 37°C, as indicated, the plates were photographed.

Table S1. **S. cerevisiae strains used in this study**

| Strain  | Genotype <sup>a</sup>                                                                              | Source/reference        |
|---------|----------------------------------------------------------------------------------------------------|-------------------------|
| BY4741  | <i>MATa his3-Δ 1<sup>b</sup> leu2Δ0 met15Δ0 ura3Δ0</i>                                             | Research Genetics, Inc. |
| YAT100  | <i>BY4741 gin4Δ::KanMX4</i>                                                                        | This study              |
| YFR326  | <i>BY4741 gin4Δ::KanMX4 sap190Δ::KanMX4 lys2Δ0</i>                                                 | This study              |
| YFR313  | <i>BY4741 dnf1Δ::KanMX4 dnf2Δ::KanMX4 lys2Δ0</i>                                                   | This study              |
| YFR191  | <i>BY4741 fpk1Δ::KanMX4</i>                                                                        | This study              |
| YFR205  | <i>BY4741 fpk1Δ::KanMX4 fpk2Δ::KanMX4 lys2Δ0</i>                                                   | Roelants et al., 2010   |
| YFR221  | <i>BY4741 FPK1-GFP(S65T)::HIS3MX6</i>                                                              | Roelants et al., 2010   |
| YFR224  | <i>BY4741 FPK1-GFP(S65T)::HIS3MX6 gin4Δ::KanMX4</i>                                                | This study              |
| YFR328  | <i>BY4741 FPK1-GFP(S65T)::HIS3MX6 sap190Δ::KanMX4</i>                                              | This study              |
| YJW2    | <i>BY4741 FPK1<sup>11A</sup>::HIS3<sup>c</sup></i>                                                 | This study              |
| YFR320  | <i>BY4741 sap190Δ::KanMX4</i>                                                                      | This study              |
| YFR323  | <i>BY4741 FPK1<sup>11A</sup>::HIS3 sap190Δ::KanMX4</i>                                             | This study              |
| YFR355  | <i>BY4741 GIN4-mCherry::caURA3 lys2Δ0</i>                                                          | This study              |
| YFR385  | <i>BY4741 MYO1-mCherry::caURA3</i>                                                                 | This study              |
| YFR388  | <i>BY4741 GIN4-mCherry::caURA3 MYO1-GFP(S65T)::HIS3MX6</i>                                         | This study              |
| YFR386  | <i>BY4741 hof1Δ::KanMX4 [pRS316-HOF1]</i>                                                          | This study              |
| YFR396  | <i>BY4741 FPK1<sup>11A</sup>::HIS3 hof1Δ::KanMX4 [pRS316-HOF1]</i>                                 | This study              |
| YFR398  | <i>BY4741 fpk1Δ::KanMX4 fpk2Δ::HIS3 hof1Δ::KanMX4 [pRS316-HOF1]</i>                                | This study              |
| YFR425  | <i>BY4741 fpk1Δ::KanMX4 fpk2Δ::KanMX4 cyk3Δ::KanMX4 hof1Δ::KanMX4 [pRS316-HOF1]</i>                | This study              |
| BY4742  | <i>MATα his3-Δ 1 leu2Δ0 lys2Δ0 ura3Δ0</i>                                                          | Research Genetics, Inc. |
| YFR307  | <i>BY4742 FPK1<sup>11A</sup>::HIS3</i>                                                             | This study              |
| YFR308  | <i>BY4742 FPK1<sup>11A</sup>::HIS3 dnf1Δ::KanMX4</i>                                               | This study              |
| YFR312  | <i>BY4742 FPK1<sup>11A</sup>::HIS3 dnf1Δ::KanMX4 dnf2Δ::KanMX4</i>                                 | This study              |
| JTY6581 | <i>BY4742 fpk1Δ::KanMX4</i>                                                                        | Research Genetics, Inc. |
| YFR278  | <i>BY4742 fpk1Δ::KanMX4 fpk2Δ::HIS3 gin4Δ::KanMX4 LYS2 met15Δ0</i>                                 | This study              |
| sap190Δ | <i>BY4742 sap190Δ::KanMX4</i>                                                                      | Research Genetics, Inc. |
| YFR387  | <i>BY4742 hof1Δ::KanMX4 [pRS316-HOF1]</i>                                                          | This study              |
| YFR422  | <i>BY4742 cyk3Δ::KanMX4 hof1Δ::KanMX4 [pRS316-HOF1]</i>                                            | This study              |
| YFR424  | <i>BY4742 fpk1Δ::KanMX4 fpk2Δ::KanMX4 hof1Δ::KanMX4 [pRS316-HOF1]</i>                              | This study              |
| YFR438  | <i>BY4742 myo1Δ::LEU2 [pRS316-MYO1] LYS2 met15Δ0</i>                                               | This study              |
| YFR439  | <i>BY4742 myo1Δ::LEU2 FPK1<sup>11A</sup>::HIS3 [pRS316-MYO1] LYS2</i>                              | This study              |
| YFR440  | <i>BY4742 myo1Δ::LEU2 fpk1Δ::KanMX4 fpk2Δ::KanMX4 [pRS316-MYO1] met15Δ0</i>                        | This study              |
| YFR448  | <i>BY4742 myo1Δ::leu2::KanMX FPK1<sup>11A</sup>::HIS3 [pRS316-MYO1] [YCpLG] MATα</i>               | This study              |
| YFR449  | <i>BY4742 myo1Δ::leu2::KanMX FPK1<sup>11A</sup>::HIS3 [pRS316-MYO1] [YCpLG-CDC42] LYS2 met15Δ0</i> | This study              |
| YFR451  | <i>BY4742 myo1Δ::leu2::KanMX FPK1<sup>11A</sup>::HIS3 [pRS316-MYO1] [pRS315]</i>                   | This study              |
| YFR452  | <i>BY4742 myo1Δ::leu2::KanMX FPK1<sup>11A</sup>::HIS3 [pRS316-MYO1] [pMETprom-CDC24] LYS2</i>      | This study              |
| Y258    | <i>MATα his4-580 ura3-52 leu2-3,112 pep4-3<sup>d</sup></i>                                         | GE Healthcare           |
| BY4743  | <i>his3-Δ 1/his3-Δ 1 leu2Δ0/leu2Δ0 ura3Δ0/ura3Δ0 met15Δ0/MET15 lys2Δ0/LYS2</i>                     | Research Genetics, Inc. |
| YFR420  | <i>BY4743 myo1Δ::LEU2/MYO1</i>                                                                     | This study              |
| YFR412  | <i>BY4743 myo1Δ::LEU2/MYO1 FPK1<sup>11A</sup>::HIS3/FPK1<sup>11A</sup>::HIS3</i>                   | This study              |
| YFR443  | <i>BY4743 myo1Δ::leu2::KanMX/MYO1 FPK1<sup>11A</sup>::HIS3/FPK1<sup>11A</sup>::HIS3</i>            | This study              |
| YFR413  | <i>BY4743 myo1Δ::LEU2/MYO1 fpk1Δ::KanMX4/fpk1Δ::KanMX4 fpk2Δ::KanMX4/fpk2Δ::KanMX4</i>             | This study              |
| YFR421  | <i>BY4743 inn1Δ::LEU2/INN1</i>                                                                     | This study              |
| YFR419  | <i>BY4743 inn1Δ::LEU2/INN1 FPK1<sup>11A</sup>::HIS3/FPK1<sup>11A</sup>::HIS3</i>                   | This study              |
| YFR414  | <i>BY4743 inn1Δ::LEU2/INN1 fpk1Δ::KanMX4/fpk1Δ::KanMX4 fpk2Δ::KanMX4/fpk2Δ::KanMX4</i>             | This study              |
| YFR433  | <i>BY4743 dnf1Δ::KanMX4/dnf1Δ::KanMX4 dnf2Δ::KanMX4/dnf2Δ::KanMX4</i>                              | This study              |
| YFR434  | <i>BY4743 inn1Δ::LEU2/INN1 dnf1Δ::KanMX4/dnf1Δ::KanMX4 dnf2Δ::KanMX4/dnf2Δ::KanMX4</i>             | This study              |

<sup>a</sup>All null alleles indicated with a Δ symbol are complete deletions of the ORF, unless otherwise indicated.

<sup>b</sup>This null allele is an internal deletion of a 187-bp HindIII–HindIII fragment (nucleotides 305–492) from the *HIS3* ORF (Scherer and Davis, 1979).

<sup>c</sup>The *FPK1<sup>11A</sup>* allele carries the following substitution mutations of *FPK1* (S35A S51A S52A S53A S200A S227A S229A S300A S414A T435A S436A), as described in this study.

<sup>d</sup>The mutations carried by this strain represent: *his4-580*, a strongly polar mutation that drastically reduces all three activities (phosphoribosyl-ATP pyrophosphatase, phosphoribosyl-AMP cyclohydrolase, and histidinol dehydrogenase) encoded in the *HIS4* gene product (Fink and Styles, 1974), but whose molecular identity has not yet been characterized (Fink, G.R., personal communication); *ura3-52*, an insertion of the endogenous yeast retrotransposon Ty1 at codon 121 in the *URA3* ORF (and transcribed in the same orientation as would the *URA3* mRNA; Rose and Winston, 1984); *leu2-3,112*, containing two frameshift mutations that destroy the *LEU2* ORF, a G insertion at nucleotide 249, and a G insertion at nucleotide 792, as well as a GTC-to-GTT silent change at codon 56, a GTT-to-GCT missense change at codon 69, a GTT-to-GTC silent change at codon 299, and a GAC-to-AAC missense change at codon 300 (Hinnen et al., 1978); and *pep4-3* (Hemmings et al., 1981), a nonsense mutation converting TGG (Trp) at codon 39 of the *PEP4* ORF to TGA (stop; Woolford et al., 1993).

Table S2. **Plasmids used in this study**

| Plasmid             | Description                                                                                       | Source/reference                |
|---------------------|---------------------------------------------------------------------------------------------------|---------------------------------|
| pGEX4T-1            | GST tag, bacterial expression vector                                                              | GE Healthcare                   |
| pAB1                | pGEX4T-1 <i>GIN4</i>                                                                              | This study                      |
| pAT103              | pGEX4T-1 <i>Gin4(K48A)</i>                                                                        | This study                      |
| pFR143              | pGEX4T-1 <i>FPK1</i>                                                                              | Roelants et al., 2010           |
| pFR144              | pGEX4T-1 <i>fpk1(D621A)</i>                                                                       | Roelants et al., 2010           |
| pBS1                | pGEX4T-1 <i>fpk1(1-472)</i>                                                                       | This study                      |
| pBS2                | pGEX4T-1 <i>fpk1(473-893) D621A</i>                                                               | This study                      |
| pJW2                | pGEX4T-1 <i>fpk1(1-472) S35A S51A S52A S53A S200A S227A S229A S300A S414A T435A S436A</i>         | This study                      |
| pRS303              | <i>HIS3</i> ; an integrative [YIp] vector                                                         | Sikorski and Hieter, 1989       |
| pJW4                | pRS303 <i>FPK1(S35A S51A S52A S53A S200A S227A S229A S300A S414A T435A S436A)</i>                 | This study                      |
| YEp352GAL           | 2 $\mu$ m, <i>URA3</i> , <i>GAL1<sub>prom</sub></i> vector                                        | Benton et al., 1994             |
| pAM76               | YEp352GAL <i>YPK1-myc</i>                                                                         | Roelants et al., 2002           |
| YEp351GAL           | 2 $\mu$ m, <i>LEU2</i> , <i>GAL1<sub>prom</sub></i> vector                                        | Benton et al., 1994             |
| pAM54               | YEp351GAL <i>YPK1-myc</i>                                                                         | Casamayor et al., 1999          |
| BG1805              | 2 $\mu$ m, <i>URA3</i> , <i>GAL1<sub>prom</sub></i> , C-terminal tandem affinity (TAP) tag vector | GE Healthcare                   |
| pGin4-zz            | BG1805 <i>GIN4-zz</i>                                                                             | GE Healthcare                   |
| pFR305              | BG1805 <i>gin4(<math>\Delta</math>1026-1125)-zz</i>                                               | This study                      |
| pKcc4-zz            | BG1805 <i>KCC4</i>                                                                                | GE Healthcare                   |
| YCpUG               | <i>CEN</i> , <i>URA3</i> , <i>GAL1<sub>prom</sub></i> vector                                      | Bardwell et al., 1998           |
| pMVB115             | YCpUG <i>GIN4</i>                                                                                 | Versele and Thorner, 2004       |
| YCpLG               | <i>CEN</i> , <i>LEU2</i> , <i>GAL1<sub>prom</sub></i> vector                                      | Bardwell et al., 1998           |
| pMJS109             | YCpLG <i>HSL1-HA<sub>3</sub></i>                                                                  | Shulewitz et al., 1999          |
| pJT5241             | YCpLG <i>GIN4-eGFP<sup>a</sup></i>                                                                | G. Finnigan, Thorner laboratory |
| pRS415              | <i>CEN</i> , <i>LEU2</i> , <i>GAL1<sub>prom</sub></i> vector                                      | New England Biolabs, Inc.       |
| PB3050              | pRS415 <i>HA-CDC42</i>                                                                            | Atkins et al., 2013             |
| pJT4350             | pRS415 <i>MET15<sub>prom</sub> GFP(S65T)-A<math>\beta</math>-CDC24</i>                            | Toenjes et al., 1999            |
| pRS315              | <i>CEN</i> , <i>LEU2</i>                                                                          | Sikorski and Hieter, 1989       |
| pRC181              | pRS315- <i>TPI1<sub>prom</sub></i> vector                                                         | R.E. Chen, Thorner laboratory   |
| pFR150              | pRC181- <i>FPK1-eGFP</i>                                                                          | Roelants et al., 2010           |
| pRS316              | <i>CEN</i> , <i>URA3</i>                                                                          | Sikorski and Hieter, 1989       |
| pRS316- <i>HOF1</i> | pRS316 <i>HOF1</i>                                                                                | Vallen et al., 2000             |
| pRS316- <i>MYO1</i> | pRS316 <i>MYO1</i>                                                                                | G. Finnigan, Thorner laboratory |
| pTS408              | <i>CEN</i> , <i>URA3</i> , <i>GAL1<sub>prom</sub></i> GFP vector                                  | Carminati and Stearns, 1997     |
| pES10               | pTS408 <i>dnf1(1403-1571)-myc</i>                                                                 | This study                      |

<sup>a</sup>eGFP is GFP(F64L S65T).

## References

- Atkins, B.D., S. Yoshida, K. Saito, C.F. Wu, D.J. Lew, and D. Pellman. 2013. Inhibition of Cdc42 during mitotic exit is required for cytokinesis. *J. Cell Biol.* 202:231–240. <http://dx.doi.org/10.1083/jcb.201301090>
- Bardwell, L., J.G. Cook, J.X. Zhu-Shimoni, D. Voora, and J. Thorner. 1998. Differential regulation of transcription: repression by unactivated mitogen-activated protein kinase Kss1 requires the Dig1 and Dig2 proteins. *Proc. Natl. Acad. Sci. USA.* 95:15400–15405. <http://dx.doi.org/10.1073/pnas.95.26.15400>
- Benton, B.M., J.H. Zang, and J. Thorner. 1994. A novel FK506- and rapamycin-binding protein (FPR3 gene product) in the yeast *Saccharomyces cerevisiae* is a proline rotamase localized to the nucleolus. *J. Cell Biol.* 127:623–639. <http://dx.doi.org/10.1083/jcb.127.3.623>
- Carminati, J.L., and T. Stearns. 1997. Microtubules orient the mitotic spindle in yeast through dynein-dependent interactions with the cell cortex. *J. Cell Biol.* 138:629–641. <http://dx.doi.org/10.1083/jcb.138.3.629>
- Casamayor, A., P.D. Torrance, T. Kobayashi, J. Thorner, and D.R. Alessi. 1999. Functional counterparts of mammalian protein kinases PDK1 and SGK in budding yeast. *Curr. Biol.* 9:186–197. [http://dx.doi.org/10.1016/S0960-9822\(99\)80088-8](http://dx.doi.org/10.1016/S0960-9822(99)80088-8)
- Fink, G.R., and C.A. Styles. 1974. Gene conversion of deletions in the *his4* region of yeast. *Genetics.* 77:231–244.
- Hemmings, B.A., G.S. Zubenko, A. Hasilik, and E.W. Jones. 1981. Mutant defective in processing of an enzyme located in the lysosome-like vacuole of *Saccharomyces cerevisiae*. *Proc. Natl. Acad. Sci. USA.* 78:435–439. <http://dx.doi.org/10.1073/pnas.78.1.435>
- Hinnen, A., J.B. Hicks, and G.R. Fink. 1978. Transformation of yeast. *Proc. Natl. Acad. Sci. USA.* 75:1929–1933. <http://dx.doi.org/10.1073/pnas.75.4.1929>
- Mok, J., P.M. Kim, H.Y. Lam, S. Piccirillo, X. Zhou, G.R. Jeschke, D.L. Sheridan, S.A. Parker, V. Desai, M. Jwa, et al. 2010. Deciphering protein kinase specificity through large-scale analysis of yeast phosphorylation site motifs. *Sci. Signal.* 3:ra12. <http://dx.doi.org/10.1126/scisignal.2000482>
- Roelants, F.M., P.D. Torrance, N. Bezman, and J. Thorner. 2002. Pkh1 and Pkh2 differentially phosphorylate and activate Ypk1 and Ykr2 and define protein kinase modules required for maintenance of cell wall integrity. *Mol. Biol. Cell.* 13:3005–3028. <http://dx.doi.org/10.1091/mbc.E02-04-0201>
- Roelants, F.M., A.G. Baltz, A.E. Trott, S. Fereres, and J. Thorner. 2010. A protein kinase network regulates the function of aminophospholipid flippases. *Proc. Natl. Acad. Sci. USA.* 107:34–39. <http://dx.doi.org/10.1073/pnas.0912497106>
- Rose, M., and F. Winston. 1984. Identification of a Ty insertion within the coding sequence of the *S. cerevisiae* *URA3* gene. *Mol. Gen. Genet.* 193:557–560. <http://dx.doi.org/10.1007/BF00382100>
- Scherer, S., and R.W. Davis. 1979. Replacement of chromosome segments with altered DNA sequences constructed *in vitro*. *Proc. Natl. Acad. Sci. USA.* 76:4951–4955. <http://dx.doi.org/10.1073/pnas.76.10.4951>
- Shulewitz, M.J., C.J. Inouye, and J. Thorner. 1999. Hsl7 localizes to a septin ring and serves as an adapter in a regulatory pathway that relieves tyrosine phosphorylation of Cdc28 protein kinase in *Saccharomyces cerevisiae*. *Mol. Cell. Biol.* 19:7123–7137.
- Sikorski, R.S., and P. Hieter. 1989. A system of shuttle vectors and yeast host strains designed for efficient manipulation of DNA in *Saccharomyces cerevisiae*. *Genetics.* 122:19–27.
- Toenjes, K.A., M.M. Sawyer, and D.I. Johnson. 1999. The guanine-nucleotide-exchange factor Cdc24p is targeted to the nucleus and polarized growth sites. *Curr. Biol.* 9:1183–1186. [http://dx.doi.org/10.1016/S0960-9822\(00\)80022-6](http://dx.doi.org/10.1016/S0960-9822(00)80022-6)
- Vallen, E.A., J. Caviston, and E. Bi. 2000. Roles of Hof1p, Bni1p, Bnr1p, and myo1p in cytokinesis in *Saccharomyces cerevisiae*. *Mol. Biol. Cell.* 11:593–611. <http://dx.doi.org/10.1091/mbc.11.2.593>
- Verselle, M., and J. Thorner. 2004. Septin collar formation in budding yeast requires GTP binding and direct phosphorylation by the PAK, Cla4. *J. Cell Biol.* 164:701–715. <http://dx.doi.org/10.1083/jcb.200312070>
- Woolford, C.A., J.A. Noble, J.D. Garman, M.F. Tam, M.A. Innis, and E.W. Jones. 1993. Phenotypic analysis of proteinase A mutants. Implications for autoactivation and the maturation pathway of the vacuolar hydrolases of *Saccharomyces cerevisiae*. *J. Biol. Chem.* 268:8990–8998.
